# Supplementary material
Source: publisher site journal article supplement (https://www.spandidos-publications.com/6142/downloadSupplementary)

Figure S1. Funnel plot for overall mortality.

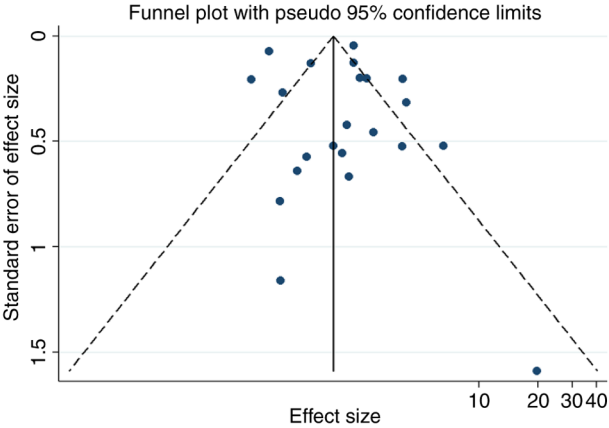

Figure S2. Funnel plot for in-hospital mortality.

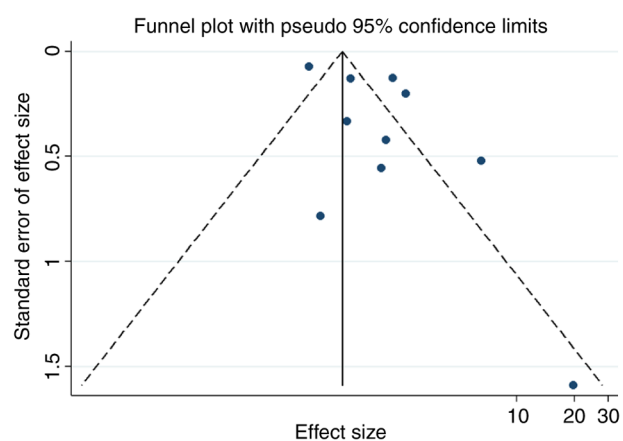

Figure S3. Funnel plot for length of hospital stay.

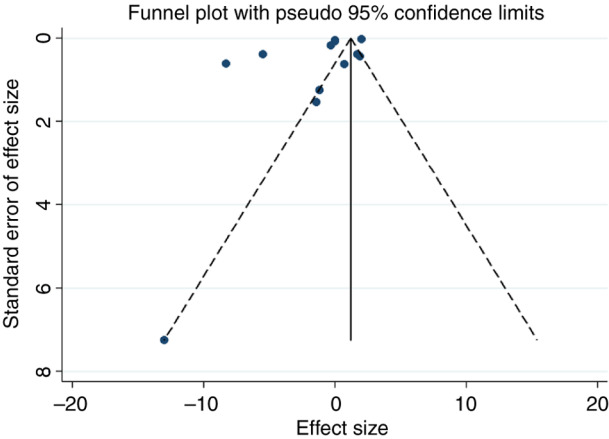

Supplement: Supplementary file 1 [file downloadSupplementary]
